# Supplementary material
Source: PubMed Central journal article supplement (PMC3299418)

**Web Figure 1.** Generalized Linear Model Showing the Association Between the Index of Coincident Economic Indicators and the Predicted Monthly Rate of Violent Suicides per 100,000 New York City Residents After Accounting for Time-trends, 1990-2006; Points Represent Actual Monthly Rate of Suicide Mortality per 100,000 Residents of New York City, the Solid Line Represents Predicted Values, and Dotted Lines Indicate 95% Confidence Intervals

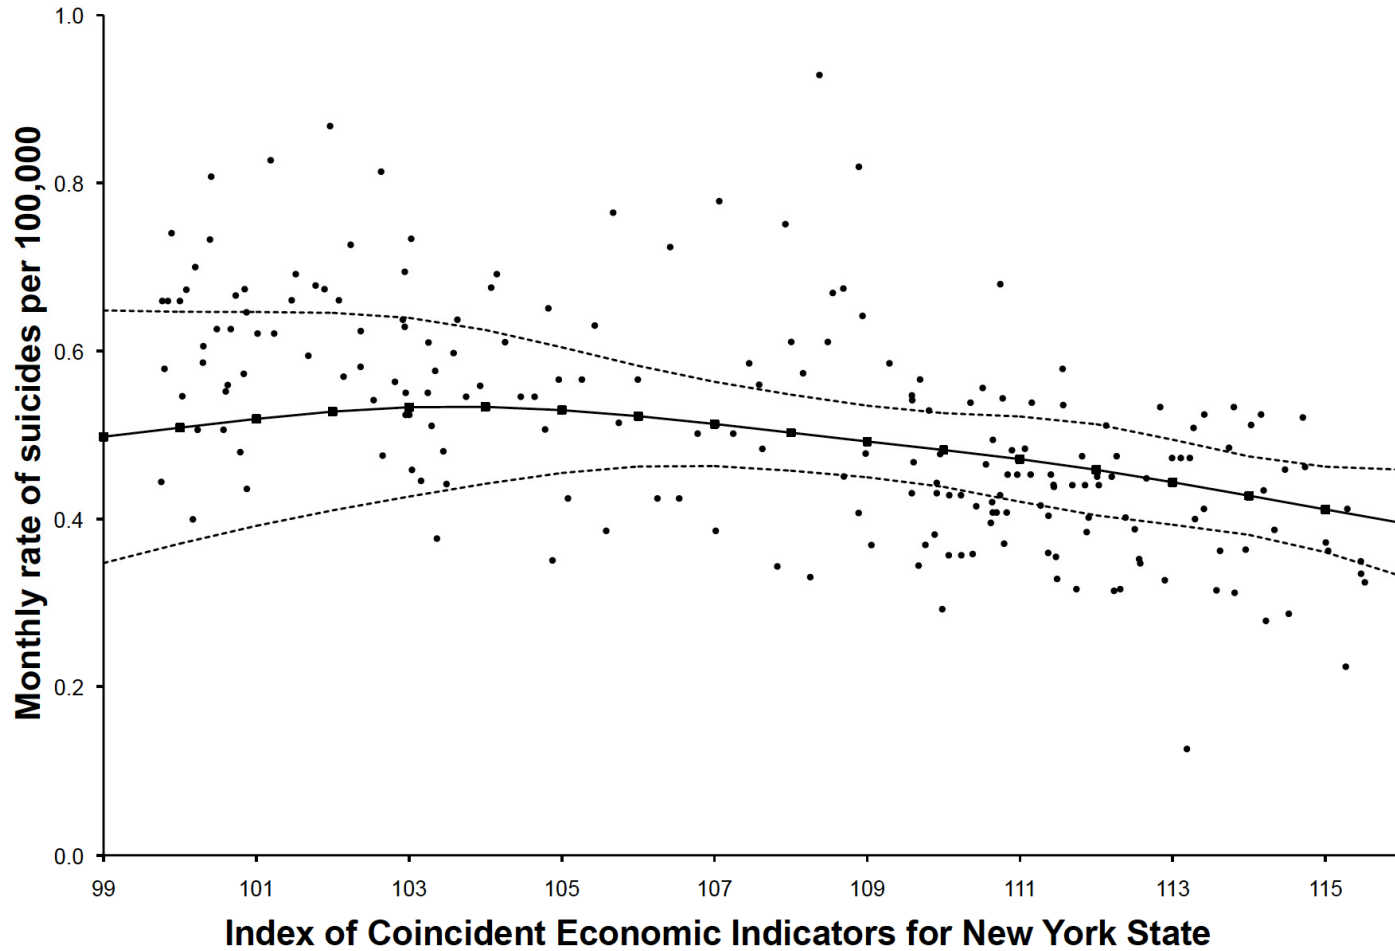

**Web Figure 2.** Generalized Additive Model Showing the Association Between the Index of Coincident Economic Indicators and the Predicted Monthly Rate of Violent Suicides per 100,000 New York City Residents After Accounting for Time-trends, Stratified by Race/ethnicity, 1990-2006; Solid Line Represents Predicted Values and Dotted Lines Indicate 95% Confidence Intervals

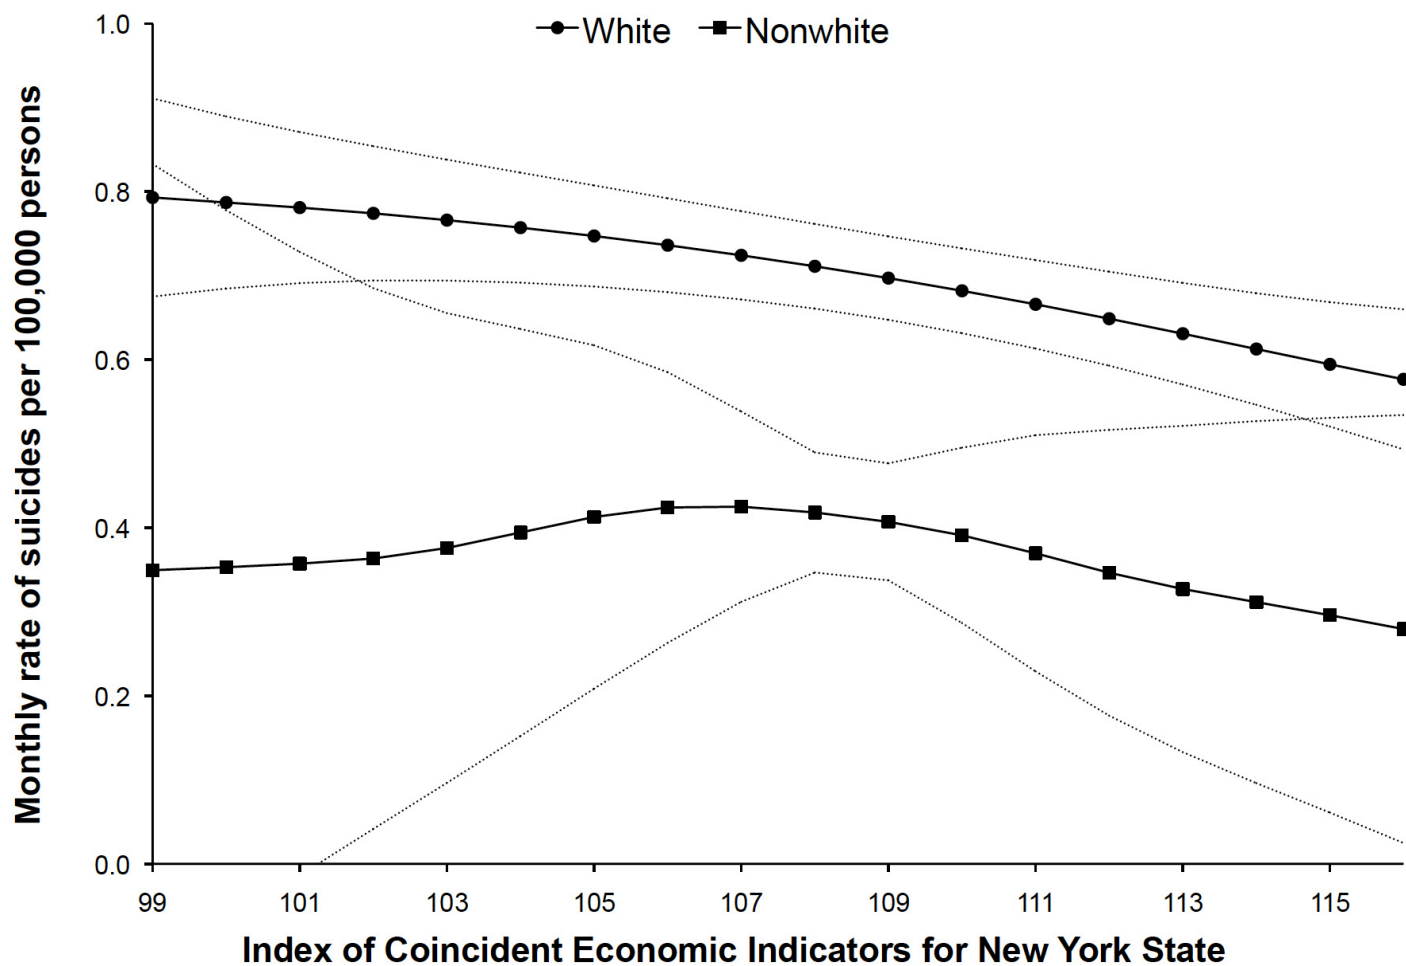

**Web Figure 3.** Generalized Additive Model Showing the Association Between the Index of Coincident Economic Indicators and the Predicted Monthly Rate of Violent Suicides per 100,000 New York City Residents After Accounting for Time-trends, Stratified by Sex, 1990-2006; Solid Line Represents Predicted Values, and Dotted Lines Indicate 95% Confidence Intervals

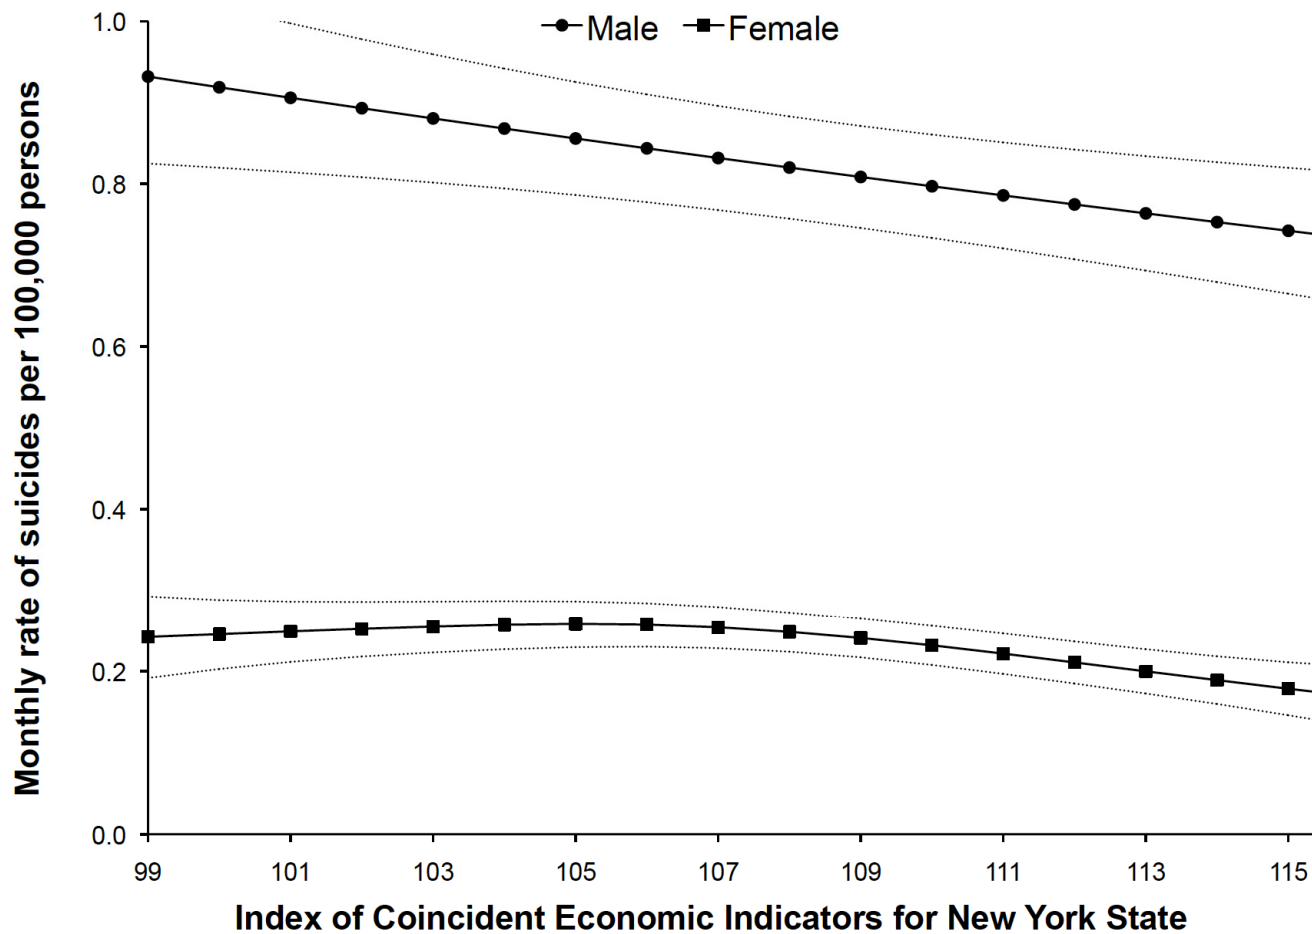

**Web Figure 4.** Generalized Additive Model Showing the Association Between the Index of Coincident Economic Indicators and the Predicted Monthly Rate of Violent Suicides per 100,000 New York City Residents After Accounting for Time-trends, Stratified by Age, 1990-2006; Solid Line Represents Predicted Values, and Dotted Lines Indicate 95% Confidence Intervals

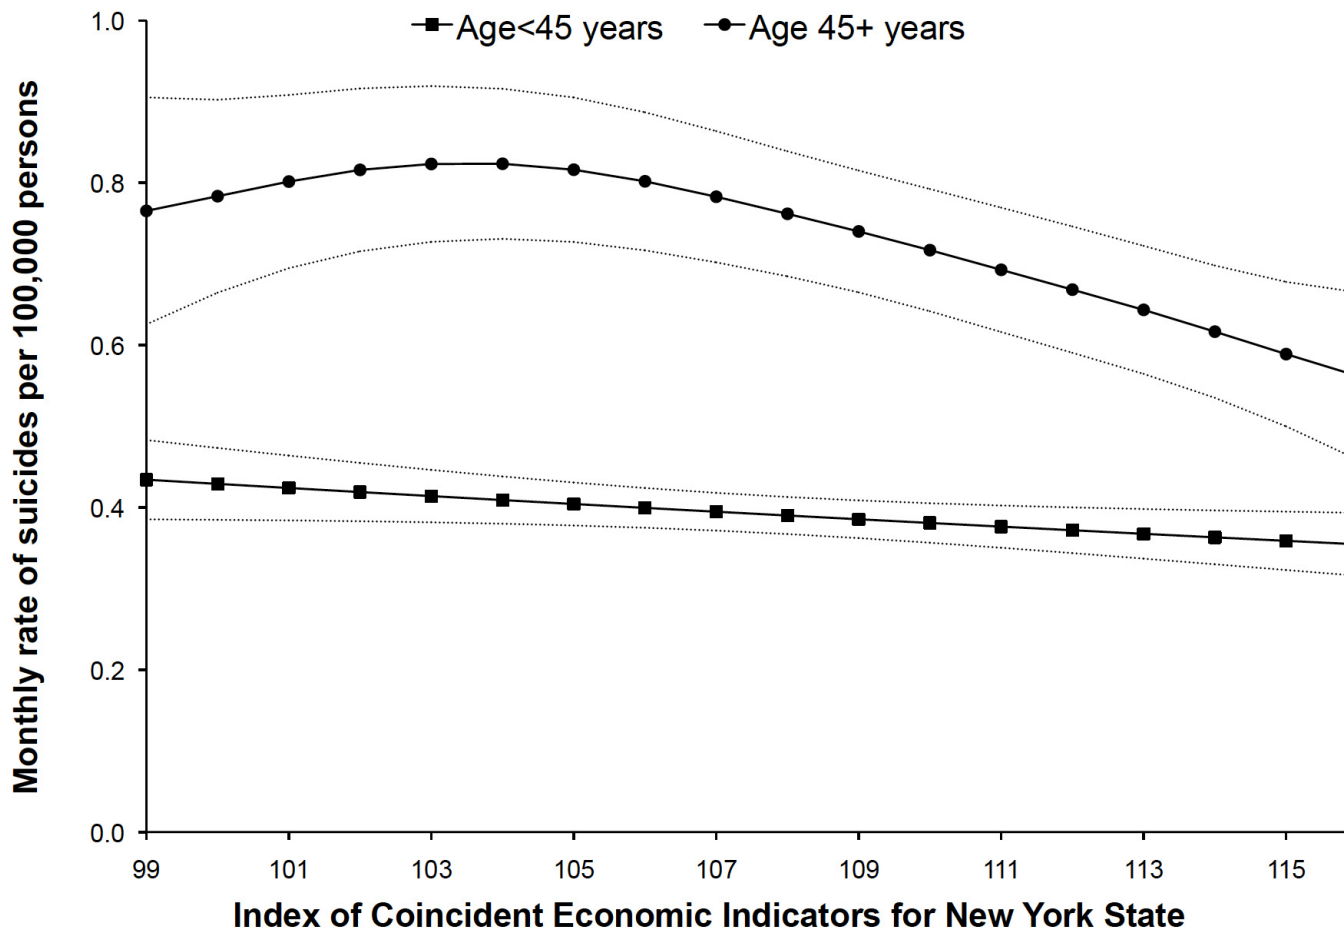

Supplement: supp_kwr355_kwr355_Web_Figures.pdf [file supp_kwr355_kwr355_Web_Figures.pdf]
